# Supplementary material for: Dose-dependent functions of SWI/SNF BAF in permitting and inhibiting cell proliferation in vivo
Source: PubMed Central journal article supplement — Sci Adv. 2020 May 20;6(21):eaay3823. doi: 10.1126/sciadv.aay3823 (PMC7250657; doi:10.1126/sciadv.aay3823), 2020-05-20
Supplement: aay3823_SM.pdf [file aay3823_SM.pdf]

[advances.sciencemag.org/cgi/content/full/6/21/eaay3823/DC1](https://advances.sciencemag.org/cgi/content/full/6/21/eaay3823/DC1)

## Supplementary Materials for

### **Dose-dependent functions of SWI/SNF BAF in permitting and inhibiting cell proliferation in vivo**

Aniek van der Vaart, Molly Godfrey, Vincent Portegijs, Sander van den Heuvel\*

\*Corresponding author. Email: [s.j.l.vandenheuvel@uu.nl](mailto:s.j.l.vandenheuvel@uu.nl)

Published 20 May 2020, *Sci. Adv.* **6**, eaay3823 (2020)  
DOI: 10.1126/sciadv.aay3823

#### **This PDF file includes:**

Figs. S1 to S6  
Tables S1 and S2

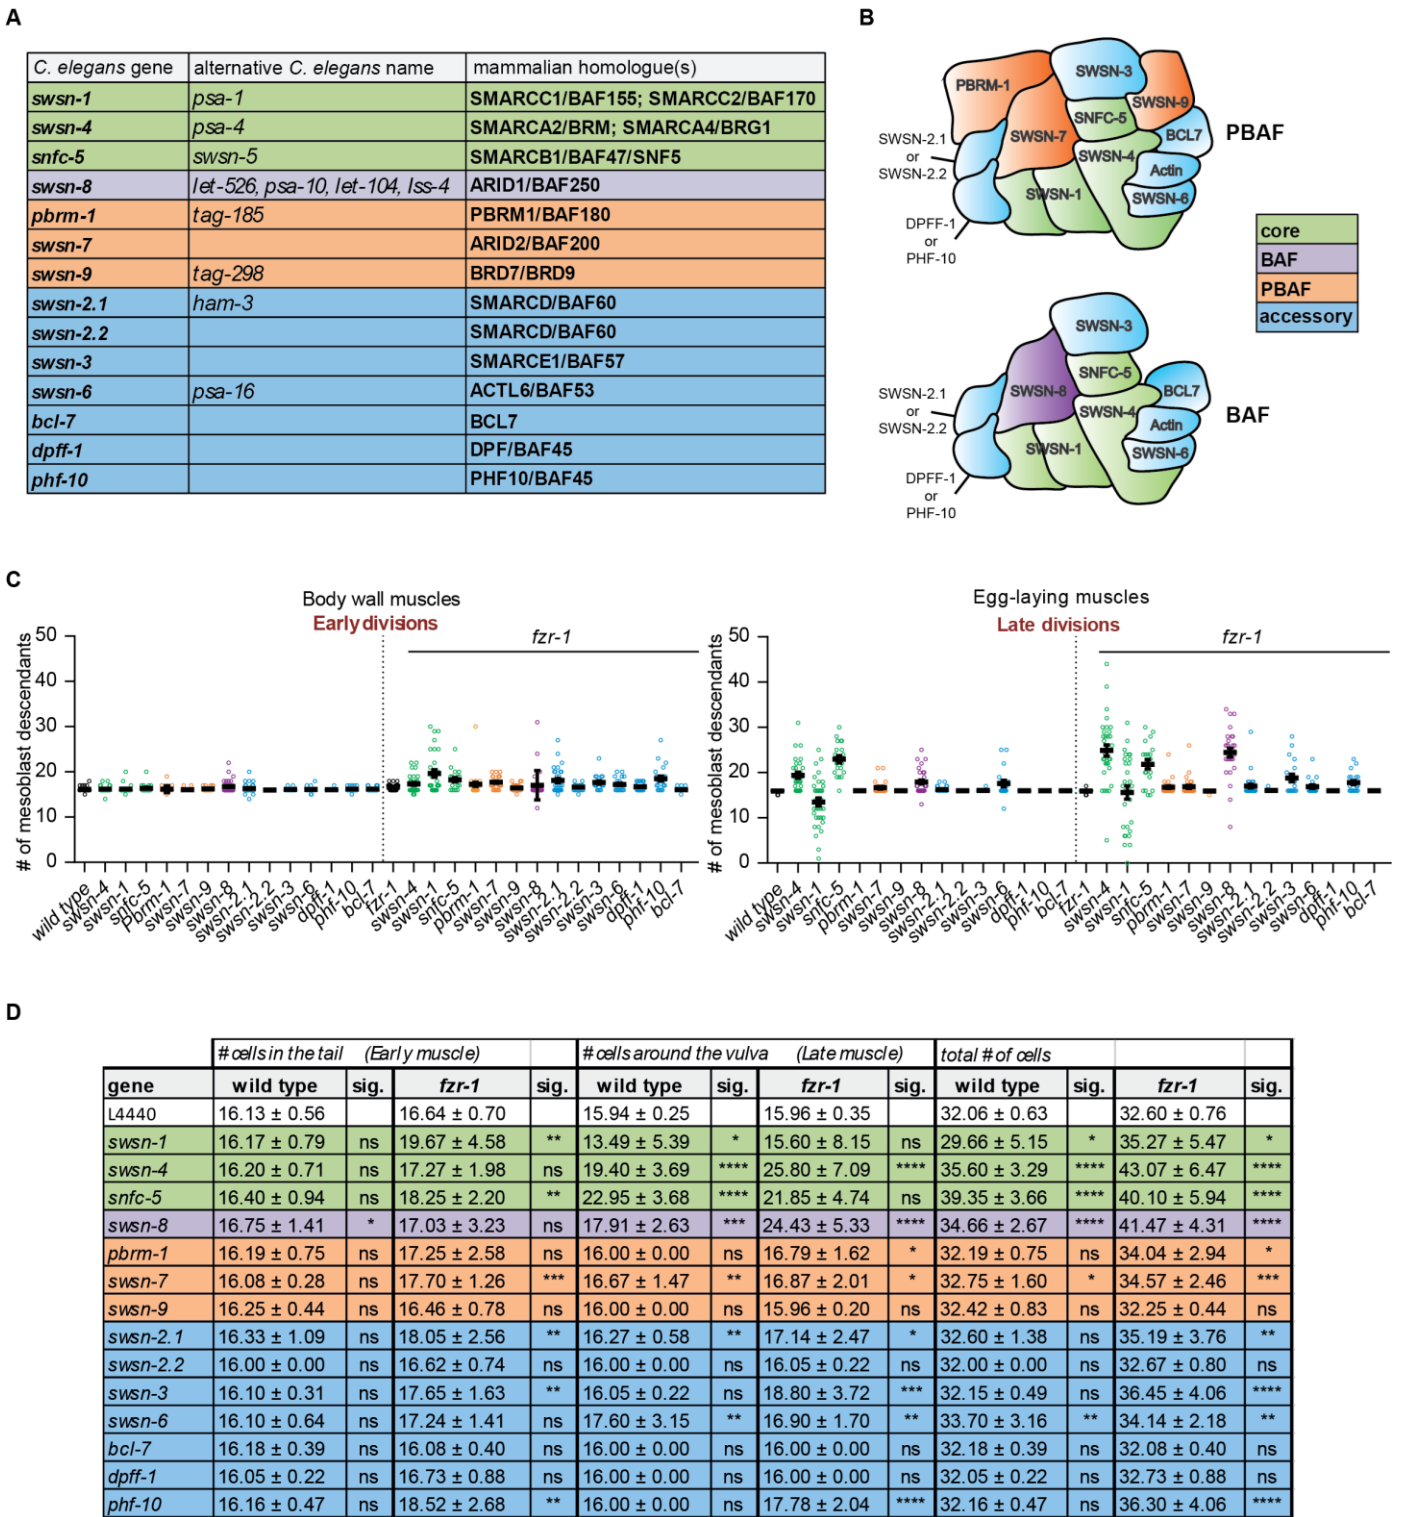

**Fig. S1. The SWI/SNF BAF complex promotes cell cycle exit.** (A) The SWI/SNF complex consists of core, accessory, and BAF and PBAF-specific signature subunits. Table of *C. elegans* names used in this publication, alternative *C. elegans* nomenclature, and commonly used mammalian homologue names for the different subunits. (B) A schematic representation of the two conserved SWI/SNF subcomplexes (using *C. elegans* nomenclature). (C) Quantification of mesoblast lineage descendants, in the tail area (early dividing body wall muscles) and around the vulva (late dividing egg-laying muscles) at the L4 larval stage following RNAi by feeding of synchronised L1 larvae for the indicated genes, in wild type or mutant backgrounds, with (D) table of mean mesoblast cell numbers, standard deviations and tests for significance compared to wild type and *fzf-1* knockout larvae for each RNAi treatment. L4440 indicates the empty vector used in the RNAi control-treated animals.

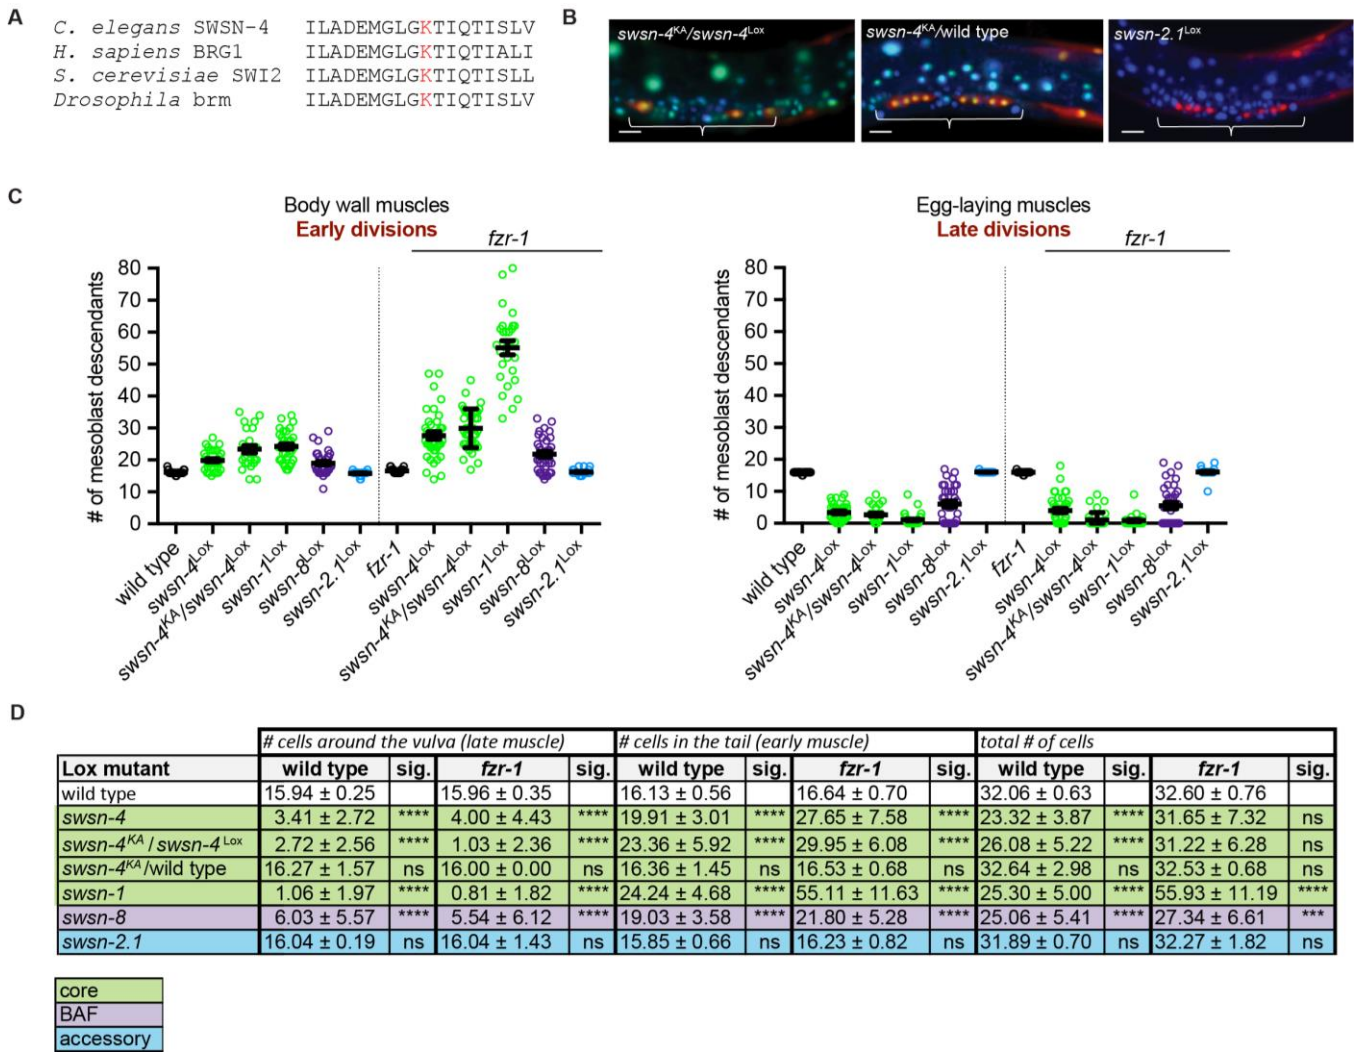

**Fig. S2. Simultaneous knockout of *fzf-1* (Cdh-1) increases M descendant hyperplasia early after SWI/SNF gene knockout, but does not suppress the proliferation defect of late M descendants.** (A) Illustration of the conserved lysine residue in the ATPase domain of SWSN-4, which is mutated to alanine (KA) to abolish ATPase activity. (B) Representative images of *swsn-4<sup>KA</sup>* trans-heterozygotes in the presence and absence of a wild type copy of *swsn-4* (marked in cis with *Peft-3::gfp*) and of *swsn-2.1<sup>Lox</sup>* knockout larvae. Brackets indicate egg-laying muscle precursors, scale bar 10  $\mu$ m. (C) Quantification of mesoblast lineage descendants in the tail area (early formed BWM) and around the vulva (late dividing egg-laying muscle precursors) at the L4 larval stage of the indicated genotypes in wild type or *fzf-1* mutant backgrounds, with (D) table of mean mesoblast cell numbers, standard deviations and tests for significance compared to wild type and *fzf-1* knockout larvae for the indicated genotypes.

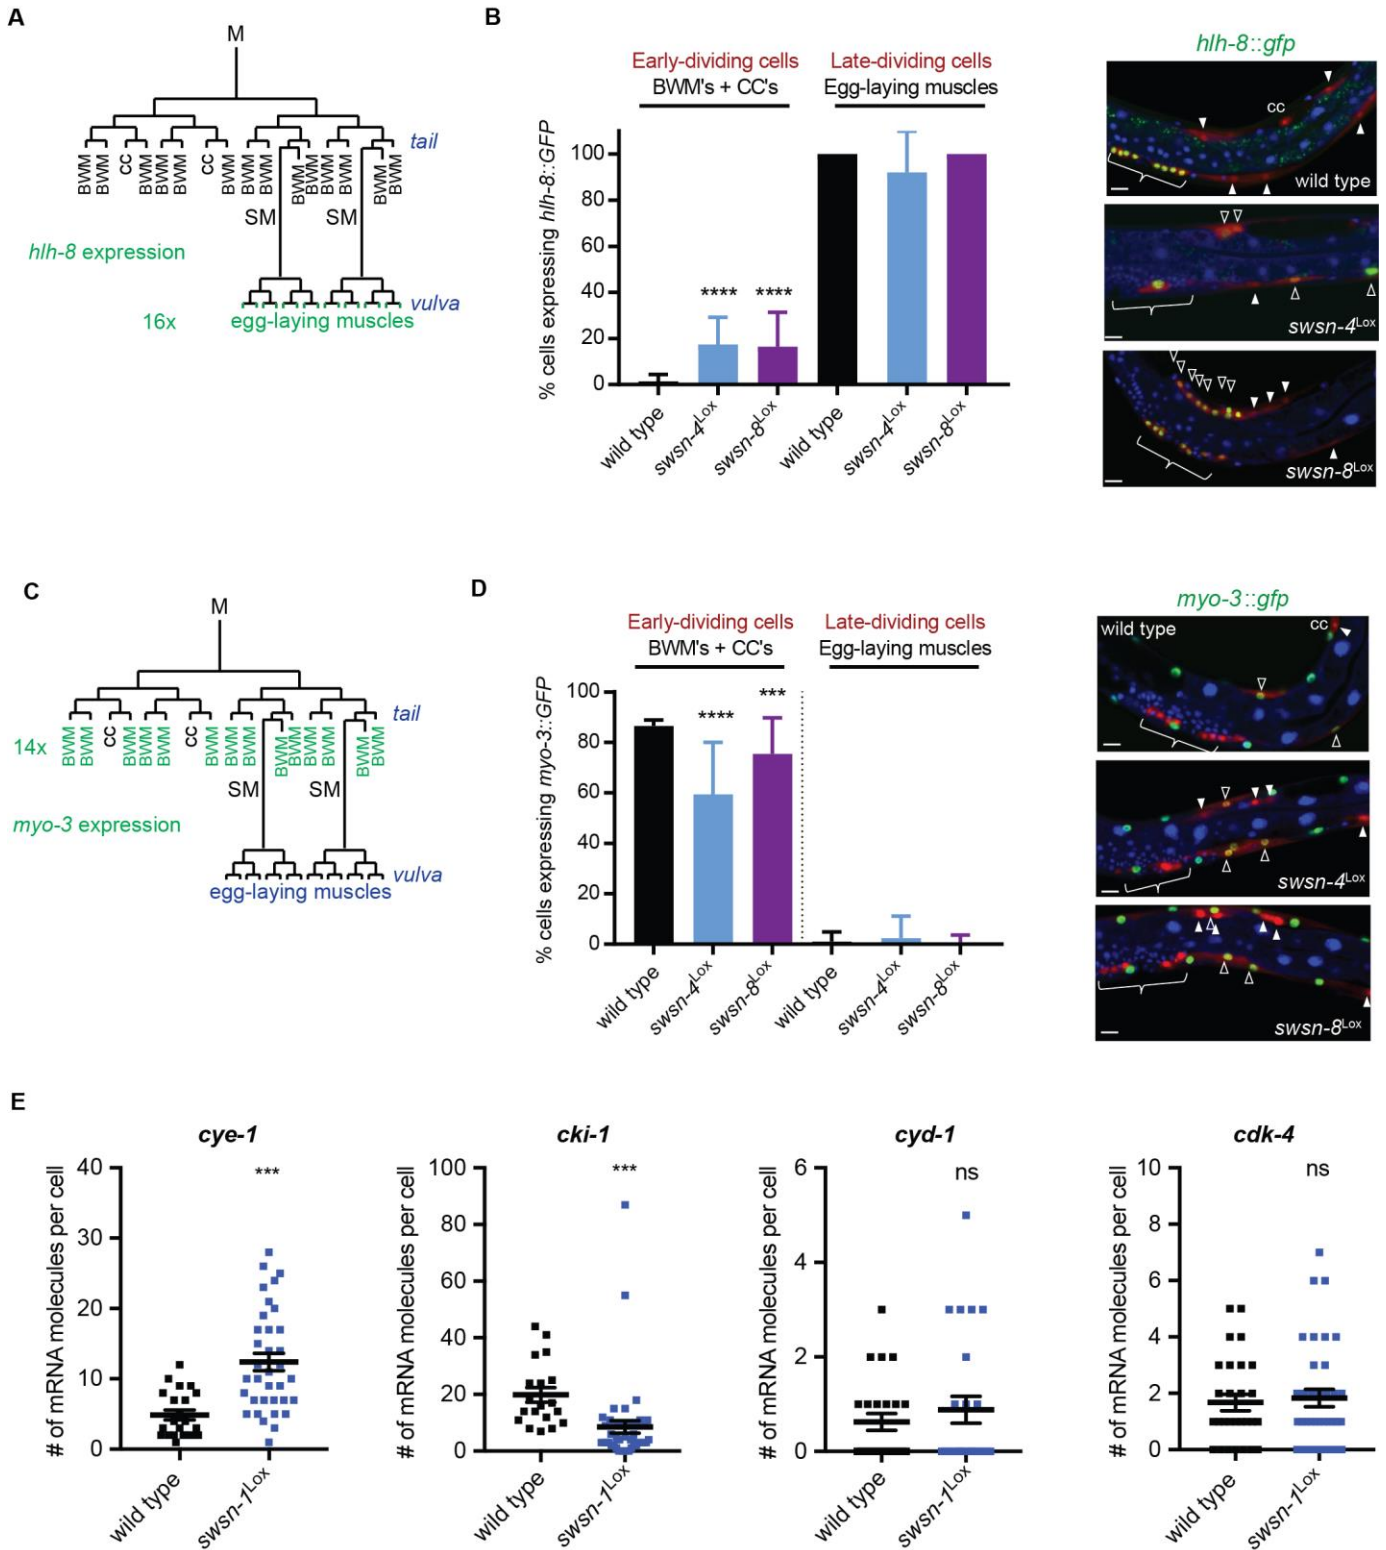

**Fig. S3. Extra M lineage descendants in the conditional SWI/SNF knockout animals correspond to a prolonged proliferative and undifferentiated state.** (A) Illustration of the wild type expression pattern of *Phlh-8::gfp*, which is restricted to the 16 egg-laying muscle precursors in early L4 larvae. (B) Percentage of mesoblast descendants expressing *Phlh-8::gfp* in early L4 larvae, for the indicated genotypes, with representative fluorescence microscopy images (right). Microscopy images: closed triangles indicate M descendants that only express the mCherry reporter. Open triangles indicate GFP expression in M descendants. Brackets indicate the vulva area. Scale bar 10  $\mu$ m. 20-30 worms were quantified for each genotype. (C) Illustration of the wild type expression pattern of *Pmyo-3::gfp* in early L4 mesoblast descendants. (D) Percentage of mesoblast descendants expressing *Pmyo-3::gfp* in early L4 larvae, for the indicated genotypes, with representative images as under B. 20-30 worms were quantified for each genotype. (E) Quantification of numbers of mRNA molecules per cell in smFISH experiments of early L4 wild-type and *swsn-1* knockout larvae for the indicated genes.

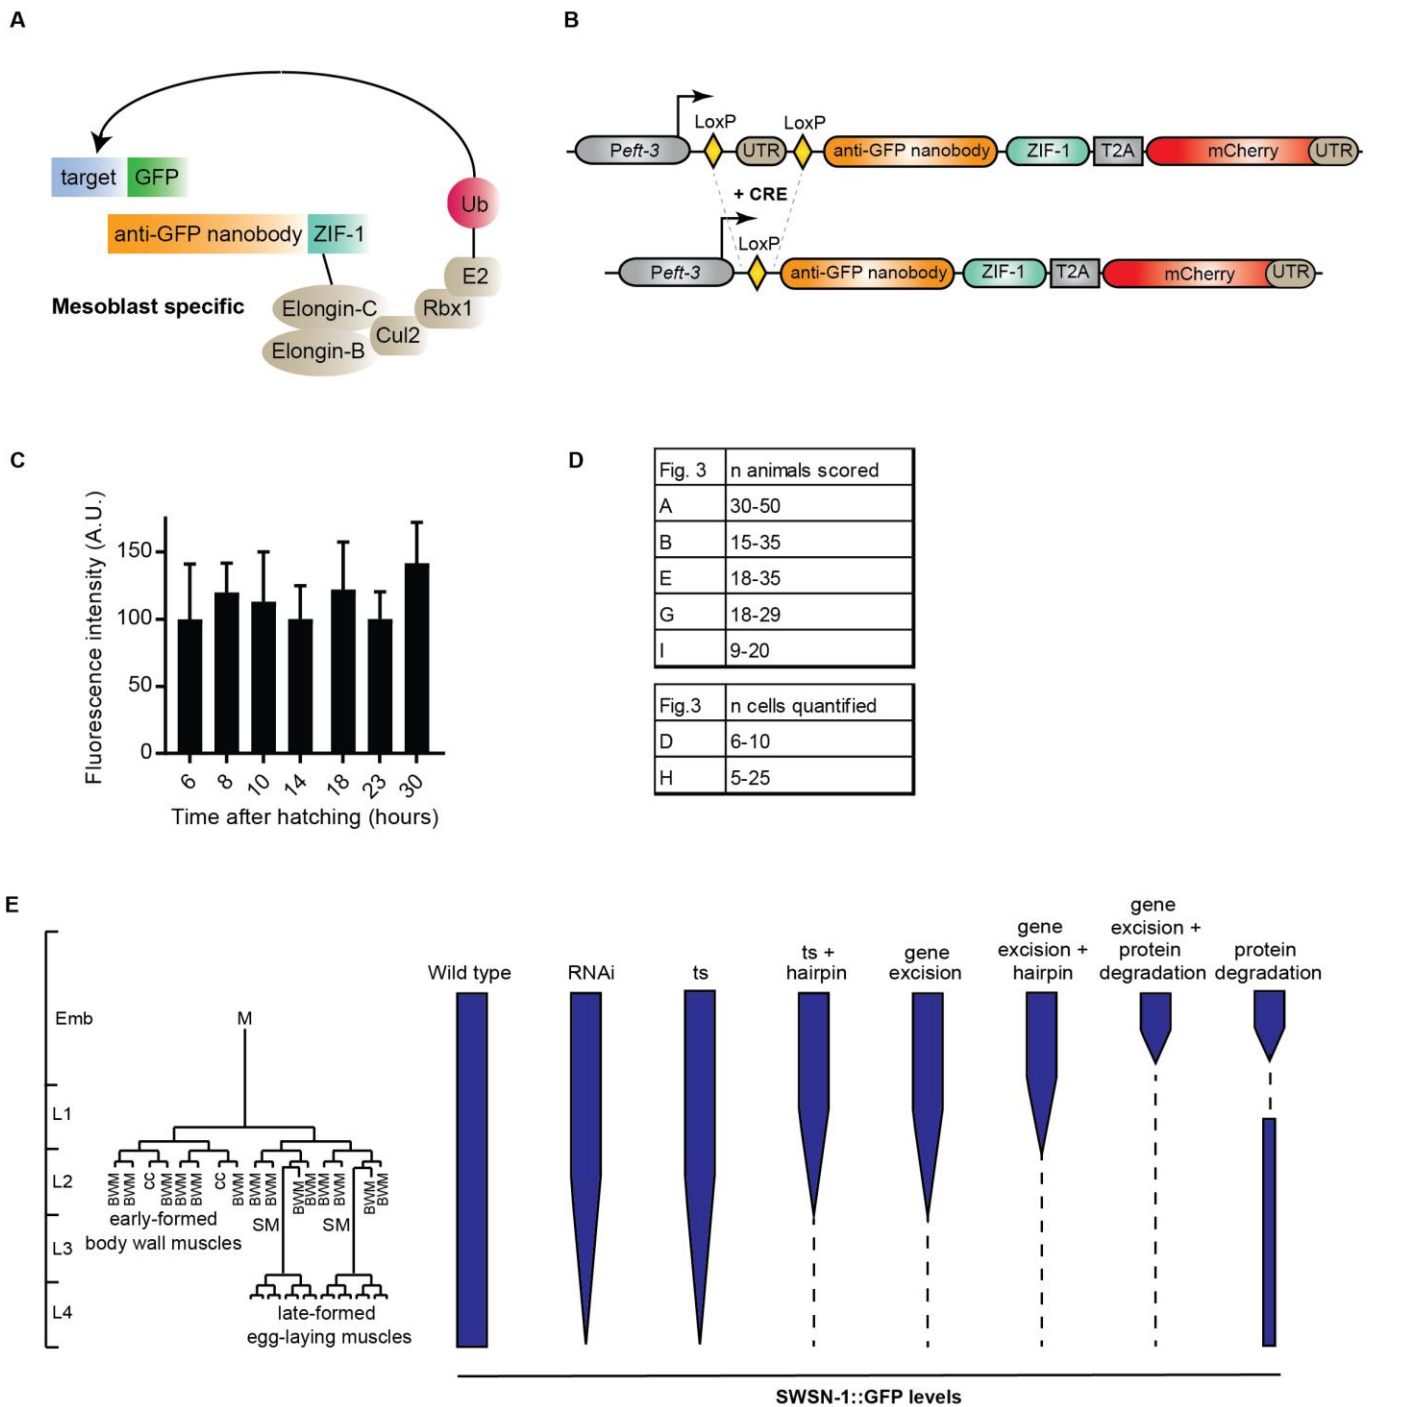

**A**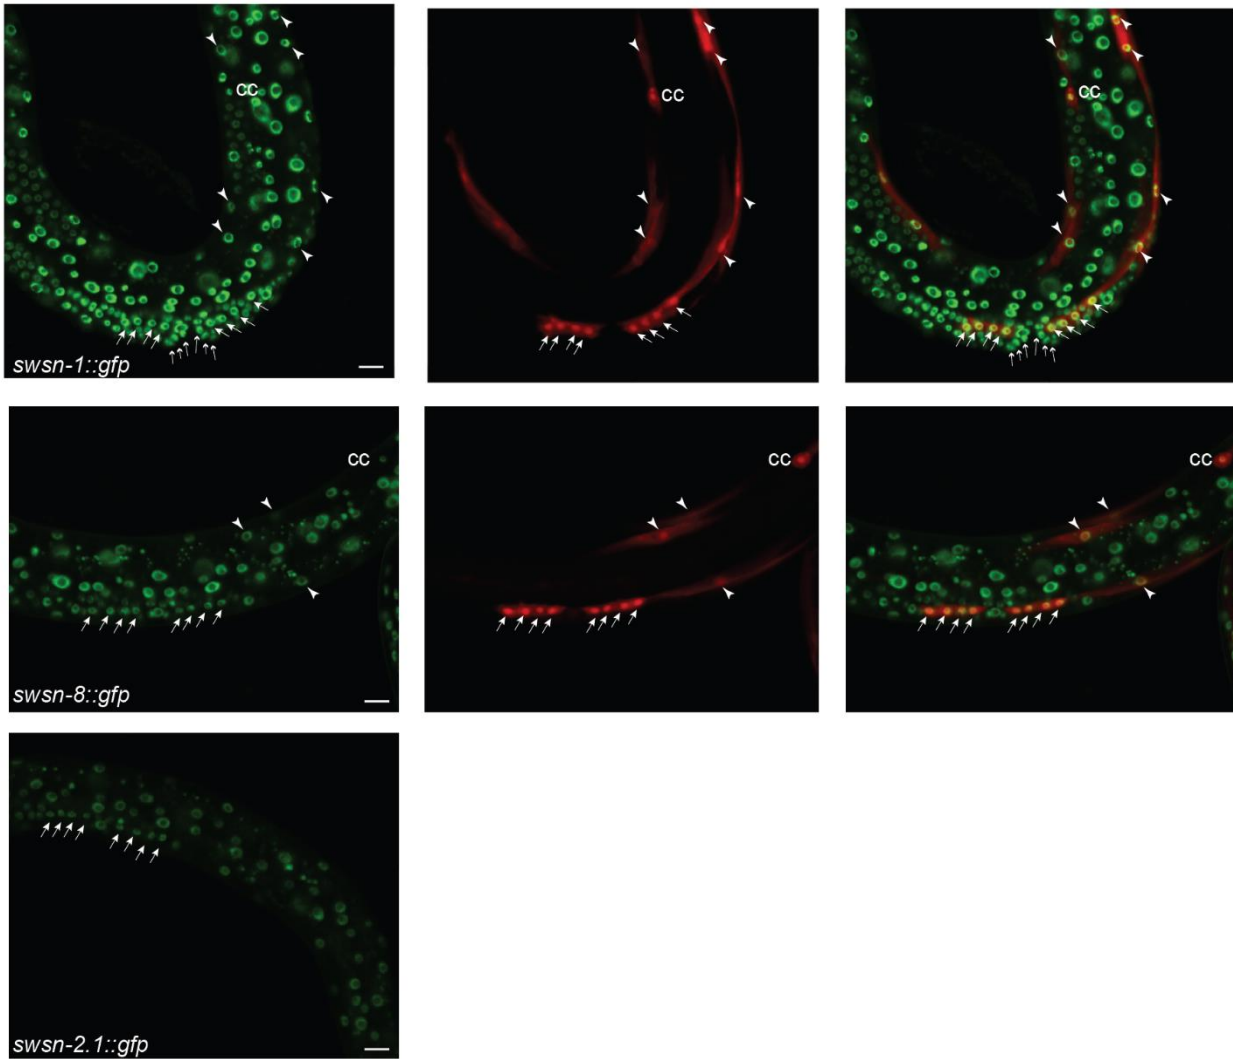**B**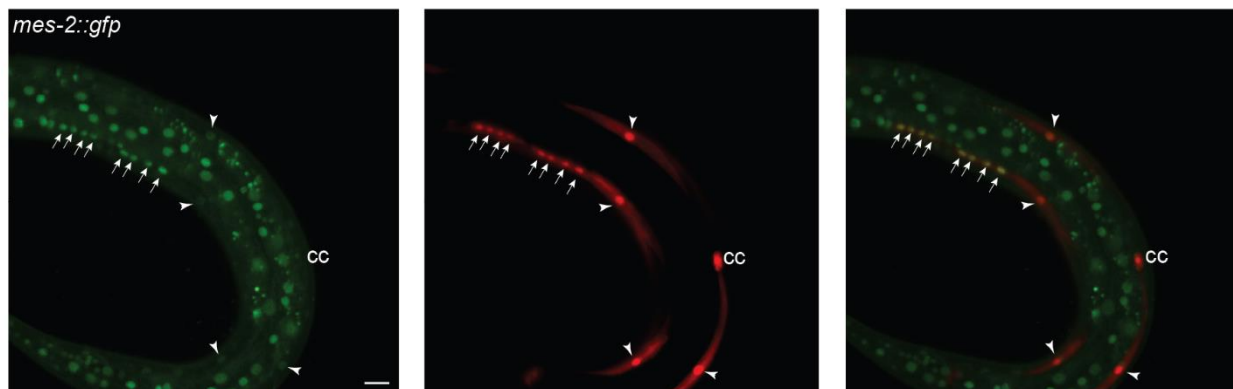

**Fig. S5. Expression of endogenous GFP-tagged SWI/SNF subunits *swsn-1*, *swsn-8* and *swsn-2.1* as well as EZH2-related PcG gene *mes-2*.** (A) Representative images of L4 larvae expressing endogenous GFP-tagged SWI/SNF subunits *swsn-1*, *swsn-8* and *swsn-2.1*. (B) Representative image of endogenous GFP-tagged EZH2-related PcG gene *mes-2*. Closed arrows indicate egg-laying muscle cells, arrowheads indicate body wall muscle cells, small open arrows indicate vulval cells (descendants of vulval precursor cells) and “cc” the coelomocytes. Scale bar 10  $\mu$ m.

A

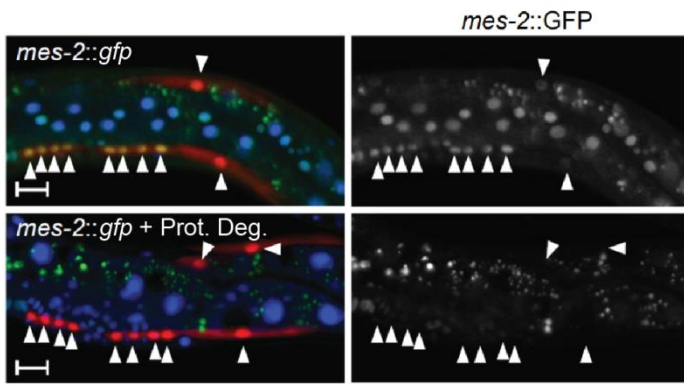

B

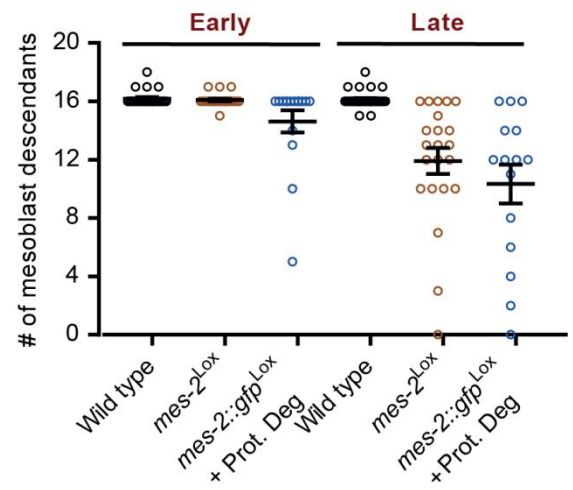

**Fig. S6. Gene excision of *mes-2::gfp<sup>Lox</sup>* combined with protein degradation did not interfere with early M cell divisions.** (A) Quantifications of mesoblast descendants for the indicated genotypes, in the tail area (early) and around the vulva (late). (B) Expression of MES-2::GFP in L4 larvae in wild type worms (top) and after protein degradation (bottom, nanobody). Arrowheads indicate M lineage descendants.

**Table S1. Strains used in this study.** List of *C. elegans* strains used in this study, with strain names in the left-hand column and genotypes in the right-hand column.

|        |                                                                                                                                                                                                                                                                                                                                                                                                                                                                                              |
|--------|----------------------------------------------------------------------------------------------------------------------------------------------------------------------------------------------------------------------------------------------------------------------------------------------------------------------------------------------------------------------------------------------------------------------------------------------------------------------------------------------|
| SV1863 | <i>heSi208</i> [ <i>Peft-3::LoxP::NLS egl-13::tagBFP2::tbb-2 UTR::LoxP::NLS egl-13::mCherry:: tbb-2 UTR</i> ] V; <i>heSi141</i> [ <i>Phlh-8::CRE</i> ] X                                                                                                                                                                                                                                                                                                                                     |
| SV1888 | <i>heSi210</i> [ <i>Peft-3::LoxP::NLS egl-13::tagBFP2::tbb-2 UTR::LoxP::NLS egl-13::mCherry:: tbb-2 UTR</i> ] III; <i>heSi141</i> [ <i>Phlh-8::CRE</i> ] X                                                                                                                                                                                                                                                                                                                                   |
| SV1930 | <i>swn-8</i> ( <i>he273he287</i> [ <i>LoxN exon 3, LoxN last intron</i> ]) I; <i>pha-1</i> (+) III; <i>heSi208</i> [ <i>Peft-3::LoxP::NLS egl-13:: tagBFP2::tbb-2 UTR::LoxP::NLS egl-13::mCherry:: tbb-2 UTR</i> ]V; <i>heSi141</i> [ <i>Phlh-8::CRE</i> ] X                                                                                                                                                                                                                                 |
| SV1871 | <i>pha-1</i> (+) III; <i>swn-4</i> ( <i>he268he272</i> [ <i>LoxN start, LoxN intron 5</i> ]) IV; <i>heSi208</i> [ <i>Peft-3::LoxP::NLS egl-13:: tagBFP2::tbb-2 UTR::LoxP::NLS egl-13::mCherry:: tbb-2 UTR</i> ] V; <i>heSi141</i> [ <i>Phlh-8::CRE</i> ] X                                                                                                                                                                                                                                   |
| SV1897 | <i>unc-119</i> ( <i>ed3</i> ) III; <i>pha-1</i> (+) III; <i>oxTi970</i> [ <i>Peft-3::GFP::2xNLS::tbb-2 UTR + Cbr-unc-119</i> (+)] IV; <i>swn-4</i> ( <i>he277</i> [ <i>K564A</i> ]); <i>swn-4</i> ( <i>he268he272</i> [ <i>LoxN start, LoxN intron 5</i> ]) IV; <i>heSi208</i> [ <i>Peft-3::LoxP::NLS egl-13::tagBFP2::tbb-2 UTR::LoxP::NLS egl-13:: mCherry:: tbb-2 UTR</i> ] V; <i>heSi141</i> [ <i>Phlh-8::CRE</i> ] X                                                                    |
| SV2044 | <i>unc-119</i> ( <i>ed3</i> ) III; <i>oxTi970</i> [ <i>Peft-3::GFP::2xNLS::tbb-2 UTR + Cbr-unc-119</i> (+)] IV; <i>swn-4</i> ( <i>he277</i> [ <i>K564A</i> ]); <i>swn-4</i> (+) IV; <i>heSi208</i> [ <i>Peft-3::LoxP::NLS egl-13::tagBFP2::tbb-2 UTR::LoxP::NLS egl-13:: mCherry:: tbb-2 UTR</i> ] V; <i>heSi141</i> [ <i>Phlh-8::CRE</i> ] X                                                                                                                                                |
| SV2025 | <i>swn-2.1</i> ( <i>he309</i> [ <i>LoxN first intron, LoxN last intron</i> ]) III; <i>pha-1</i> (+) III; <i>heSi208</i> [ <i>Peft-3::LoxP::NLS egl-13::tagBFP2::tbb-2 UTR::LoxP::NLS egl-13:: mCherry:: tbb-2 UTR</i> ] V; <i>heSi141</i> [ <i>Phlh-8::CRE</i> ] X                                                                                                                                                                                                                           |
| SV1941 | <i>swn-8</i> ( <i>he273he287</i> [ <i>LoxN exon 3, LoxN last intron</i> ]) I; <i>fzr-1</i> ( <i>ku298</i> ) II; <i>unc-4</i> ( <i>e120</i> )II; <i>pha-1</i> (+)III; <i>heSi208</i> [ <i>Peft-3::LoxP::NLS egl-13:: tagBFP2::tbb-2 UTR::LoxP::NLS egl-13::mCherry:: tbb-2 UTR</i> ] V; <i>heSi141</i> [ <i>Phlh-8::CRE</i> ] X                                                                                                                                                               |
| SV1894 | <i>fzr-1</i> ( <i>ku298</i> ) II; <i>unc-4</i> ( <i>e120</i> ) II; <i>pha-1</i> (+) III; <i>swn-4</i> ( <i>he268he272</i> [ <i>LoxN start, LoxN intron 5</i> ]) IV; <i>heSi208</i> [ <i>Peft-3::LoxP::NLS egl-13:: tagBFP2::tbb-2 UTR::LoxP::NLS egl-13::mCherry:: tbb-2 UTR</i> ] V; <i>heSi141</i> [ <i>Phlh-8::CRE</i> ] X                                                                                                                                                                |
| SV2034 | <i>fzr-1</i> ( <i>ku298</i> ) II; <i>unc-4</i> ( <i>e120</i> ) II; <i>unc-119</i> ( <i>ed3</i> ) III; <i>pha-1</i> (+) III; <i>oxTi970</i> [ <i>Peft-3::GFP::2xNLS::tbb-2 UTR + Cbr-unc-119</i> (+)] IV; <i>swn-4</i> ( <i>he277</i> [ <i>K564A</i> ]); <i>swn-4</i> ( <i>he268he272</i> [ <i>LoxN start, LoxN intron 5</i> ]) IV; <i>heSi208</i> [ <i>Peft-3::LoxP::NLS egl-13::tagBFP2::tbb-2 UTR::LoxP::NLS egl-13:: mCherry:: tbb-2 UTR</i> ] V; <i>heSi141</i> [ <i>Phlh-8::CRE</i> ] X |
| SV2033 | <i>fzr-1</i> ( <i>ku298</i> ) II; <i>unc-4</i> ( <i>e120</i> ) II; <i>unc-119</i> ( <i>ed3</i> ) III; <i>oxTi970</i> [ <i>Peft-3::GFP::2xNLS::tbb-2 UTR + Cbr-unc-119</i> (+)] IV; <i>swn-4</i> ( <i>he277</i> [ <i>K564A</i> ]); <i>swn-4</i> (+) IV; <i>heSi208</i> = [ <i>Peft-3::LoxP::NLS egl-13::tagBFP2::tbb-2 UTR::LoxP::NLS egl-13:: mCherry:: tbb-2 UTR</i> ] V; <i>heSi141</i> [ <i>Phlh-8::CRE</i> ] X                                                                           |
| SV2029 | <i>fzr-1</i> ( <i>ku298</i> ) II; <i>unc-4</i> ( <i>e120</i> ) II; <i>pha-1</i> (+) III; <i>swn-2.1</i> ( <i>he309</i> [ <i>swn-2.1 LoxN first intron, LoxN last intron</i> ]) III; <i>heSi210</i> [ <i>Peft-3::LoxP::NLS egl-13::tagBFP2::tbb-2 UTR::LoxP::NLS egl-13::mCherry:: tbb-2 UTR</i> ]III; <i>heSi141</i> [ <i>Phlh-8::CRE</i> ] X                                                                                                                                                |
| SV2027 | <i>heSi219</i> [ <i>Phlh-8::GFP::H2B::unc-54 UTR</i> ] III; <i>heSi208</i> [ <i>Peft-3::LoxP::NLS egl-13::tagBFP2::tbb-2 UTR::LoxP::NLS egl-13::mCherry:: tbb-2 UTR</i> ] V; <i>heSi141</i> [ <i>Phlh-8::CRE</i> ] X                                                                                                                                                                                                                                                                         |



|        |                                                                                                                                                                                                                                                                                                                         |
|--------|-------------------------------------------------------------------------------------------------------------------------------------------------------------------------------------------------------------------------------------------------------------------------------------------------------------------------|
| SV2030 | <i>heSi219[Phlh-8::GFP::H2B::unc-54 UTR]III; swsn-4(he268he272[LoxN start, LoxN intron 5]) IV; heSi208[Peft-3::LoxP::NLS egl-13::tagBFP2::tbb-2 UTR::LoxP::NLS egl-13::mCherry:: tbb-2 UTR]V; heSi141 [Phlh-8::CRE] X</i>                                                                                               |
| SV2031 | <i>swsn-8(he273he287[LoxN exon 3, LoxN last intron]) I; heSi219[Phlh-8::GFP::H2B::unc-54 UTR] III; heSi208[Peft-3::LoxP::NLS egl-13::tagBFP2::tbb-2 UTR::LoxP::NLS egl-13::mCherry:: tbb-2 UTR] V; heSi141[Phlh-8::CRE] X</i>                                                                                           |
| SV1578 | <i>unc-119(ed3) III; hels105[Prps-27::LoxN::NLS egl-13::mCherry::let-858 UTR::LoxN::NLS:: egl-13 GFP::let-858 UTR] IV; swsn-1(os22) V; heSi164[Prps-27::LoxN::NLS egl-13::mCherry::let-858 UTR::Pswsn-1::swsn-1::unc-54 UTR::LoxN::NLS egl-13::GFP ::let-858 UTR] V; heSi141[Phlh-8::CRE] X</i>                         |
| SV2032 | <i>unc-119(ed3) III; hels105[Prps-27::LoxN::NLS egl-13::mCherry::let-858 UTR::LoxN::NLS:: egl-13 GFP::let-858 UTR] IV; heSi164[Prps-27::LoxN::NLS egl-13::mCherry::let-858 UTR::Pswsn-1::swsn-1::unc-54 UTR::LoxN::NLS egl-13::GFP ::let-858 UTR]V; heSi141[Phlh-8::CRE] X; heEx611[Phlh-8::hairpin swsn-1::unc-54]</i> |
| SV1818 | <i>pha-1(e2123)III 7x out-crossed</i>                                                                                                                                                                                                                                                                                   |
| SV2023 | <i>swsn-1(he306[swsn-1::eGFP]) V; [Peft-3::LoxP::NLS egl-13:: tagBFP2::tbb-2 UTR::LoxP::NLS egl-13::mCherry:: tbb-2 UTR] V; heSi141[Phlh-8::CRE] X</i>                                                                                                                                                                  |
| SV2077 | <i>swsn-1(he313he315[swsn-1::eGFP::LoxP; LoxP second intron])V; heSi208 [Peft-3::LoxP::NLS egl-13::tagBFP2::3'UTR tbb-2::LoxP::NLS egl-13::mCherry::3'UTR tbb-2] V; heSi141[Phlh-8::CRE] X</i>                                                                                                                          |
| SV2098 | <i>fzr-1(ku298) II; unc-4(e120) II; swsn-1(he313he315[swsn-1::eGFP::LoxP; LoxP second intron]) V; heSi208[Peft-3::LoxP::NLS egl-13::tagBFP2::3'UTR tbb-2::LoxP::NLS egl-13::mCherry::3'UTR tbb-2] V; heSi141[Phlh-8::CRE] X</i>                                                                                         |
| SV2067 | <i>heSi210[Peft-3::LoxP::NLS egl-13::tagBFP2::tbb-2 UTR::LoxP::NLS egl-13::mCherry:: tbb-2 UTR]III; he303[peft-3::LoxP::let-858 UTR::LoxP::vhhGFP::ZIF-1::mCherry]) IV ; swsn-1(he313he315[swsn-1::eGFP::LoxP; LoxP second intron]) V; heSi141[Phlh-8::CRE] X</i>                                                       |
| SV2161 | <i>heSi210[Peft-3::LoxP::NLS egl-13::tagBFP2::tbb-2 UTR::LoxP::NLS egl-13::mCherry:: tbb-2 UTR] III; swsn-1(he313[swsn-1::eGFP::LoxP]) V; he303[peft-3::LoxP::let-858 UTR::LoxP::vhhGFP::ZIF-1::mCherry]) IV; heSi141[Phlh-8::CRE] X</i>                                                                                |
| SV2155 | <i>mes-2(he332he340[LoxN first intron, LoxNlast intron]) II; heSi208[Peft-3::LoxP::NLS egl-13::tagBFP2::3'UTR tbb-2::LoxP::NLS egl-13::mCherry::3'UTR tbb-2] V; heSi141[Phlh-8::CRE] X</i>                                                                                                                              |
| SV2185 | <i>mes-2(he332he340[LoxN first intron, LoxNlast intron]) II; swsn-4(he268he272[LoxN start, LoxN intron 5]) IV; heSi208[Peft-3::LoxP::NLS egl-13::tagBFP2::3'UTR tbb-2::LoxP::NLS egl-13::mCherry::3'UTR tbb-2] V; heSi141[Phlh-8::CRE] X</i>                                                                            |
| SV2186 | <i>swsn-8(he273he287[LoxN exon 3, LoxN last intron]) I; mes-2(he332he340[LoxN first intron, LoxNlast intron]) II; heSi208[Peft-3::LoxP::NLS egl-13::tagBFP2::3'UTR tbb-2::LoxP::NLS egl-13::mCherry::3'UTR tbb-2] V; heSi141[Phlh-8::CRE] X</i>                                                                         |
| SV2187 | <i>mes-2(he332he340[LoxN first intron, LoxN last intron]) II; swsn-1(he313he315[swsn-1::eGFP::LoxP; LoxP second intron]) V; heSi208[Peft-3::LoxP::NLS egl-13::tagBFP2::3'UTR tbb-2::LoxP::NLS egl-13::mCherry::3'UTR tbb-2] V; heSi141[Phlh-8::CRE] X</i>                                                               |
| SV2105 | <i>cki-1(he329[LoxP first intron, LoxP in UTR]) II, heSi208[Peft-3::LoxP::NLS egl-13::tagBFP2::3'UTR tbb-2::LoxP::NLS egl-13::mCherry::3'UTR tbb-2] V; heSi141[Phlh-8::CRE] X; ayIS6[Phlh-8::GFP] X</i>                                                                                                                 |

|        |                                                                                                                                                                                                                                                                                                                                                                                                                                      |
|--------|--------------------------------------------------------------------------------------------------------------------------------------------------------------------------------------------------------------------------------------------------------------------------------------------------------------------------------------------------------------------------------------------------------------------------------------|
| SV2122 | <i>cki-1</i> ( <i>he329</i> [ <i>LoxP</i> first intron, <i>LoxP</i> in UTR]) II, <i>swsn-4</i> ( <i>he277</i> [ <i>K564A</i> ]); <i>swsn-4</i> (+)IV; <i>heSi208</i> [ <i>Peft-3::LoxP::NLS egl-13::tagBFP2::tbb-2 UTR::LoxP::NLS egl-13::mCherry::3'UTR tbb-2</i> ] V; <i>heSi141</i> [ <i>Phlh-8::CRE</i> ] X; <i>aylS6</i> [ <i>Phlh-8::GFP</i> ] X                                                                               |
| SV2295 | <i>mes-2</i> ( <i>he332he334</i> [ <i>loxN</i> first intron, <i>mes-2::eGFP::LoxN</i> ]) II, <i>heSi210</i> [ <i>Peft-3::LoxP::NLS egl-13::tagBFP2::tbb-2 UTR::LoxP::NLS egl-13::mCherry::tbb-2 UTR</i> ]III; <i>he303</i> [ <i>Peft-3-LoxP-let-858 UTR-LoxP vhh gfp::ZIF-1mCherry</i> ] IV ; <i>heSi141</i> [ <i>Phlh-8::CRE</i> ] X                                                                                                |
| SV2296 | <i>mes-2</i> ( <i>he332he334</i> [ <i>loxN</i> first intron, <i>mes-2::eGFP::LoxN</i> ]) II, <i>heSi210</i> [ <i>Peft-3::LoxP::NLS egl-13::tagBFP2::tbb-2 UTR::LoxP::NLS egl-13::mCherry::tbb-2 UTR</i> ] III; <i>he303</i> [ <i>Peft-3::LoxP::let-858 UTR::LoxP vhh gfp::ZIF-1::mCherry</i> ] IV ; <i>swsn-1</i> ( <i>he313he315</i> [ <i>swsn-1::eGFP::LoxP, LoxP second intron</i> ]) V ; <i>heSi141</i> [ <i>Phlh-8::CRE</i> ] X |
| SV2081 | <i>heSi210</i> [ <i>Peft-3::LoxP::NLS egl-13::tagBFP2::tbb-2 UTR::LoxP::NLS egl-13::mCherry::tbb-2 UTR</i> ] III ; <i>swsn-1</i> ( <i>he313he315</i> [ <i>swsn-1::eGFP::LoxP; LoxP second intron</i> ]) V; <i>heSi220</i> [ <i>Plin-31::CRE</i> ] X                                                                                                                                                                                  |
| SV2082 | <i>heSi210</i> [ <i>Peft-3::LoxP::NLS egl-13::tagBFP2::tbb-2 UTR::LoxP::NLS egl-13::mCherry::tbb-2 UTR</i> ] III; <i>he303</i> [ <i>Peft-3::LoxP::let-858 UTR::LoxP::vhhGFP::ZIF-1::mCherry</i> ]) IV; <i>swsn-1</i> ( <i>he313he315</i> [ <i>swsn-1::eGFP::LoxP, LoxP second intron</i> ]) V; <i>heSi220</i> [ <i>Plin-31::CRE</i> ] X                                                                                              |
| SV2117 | <i>lin-35</i> ( <i>n745</i> ) I; <i>he317</i> [ <i>Peft-3::Lox2772::NLS egl-13::BFP::let-858 UTR::Lox2772::NLS egl-13::mCherry</i> ] IV; <i>heSi220</i> [ <i>Plin-31::CRE</i> ] X                                                                                                                                                                                                                                                    |
| SV2129 | <i>he317</i> [ <i>Peft-3::Lox2772::NLS egl-13::BFP::let-858 UTR::Lox2772::NLS egl-13::mCherry</i> ] IV; <i>swsn-1</i> ( <i>os22</i> ) V; <i>heSi220</i> [ <i>Plin-31::CRE</i> ] X                                                                                                                                                                                                                                                    |

**Table S2. Differentially expressed genes.** List of differentially expressed genes between control read-out strain and *swsn-1::gfp<sup>Lox</sup>* + Prot. Deg. M cells at 5.5 hours of development, with a padj value <0.1. Differential expression analysis was carried out by running DESeq2 on raw transcript numbers from the replicate RNA-sequencing experiments. baseMean = normalised mean number of transcripts across all replicates and conditions. log2Fold change = log2 of the fold change difference in transcript numbers between control and *swsn-1::gfp<sup>Lox</sup>* + Prot. Deg. lfcSE = standard error estimate for log2 fold change. stat= Wald statistic. pvalue = p value. padj = Benjamini-Hochberg adjusted p value (equivalent to false discovery rate).

| Wormbase sequence name | baseMean   | log2 FoldChange | lfcSE      | stat       | pvalue     | padj       | Gene name |
|------------------------|------------|-----------------|------------|------------|------------|------------|-----------|
| F59D12.2               | 3.55300172 | -5.1963925      | 1.11303548 | 4.66866744 | 3.03E-06   | 0.00052068 | F59D12.2  |
| R05C11.1               | 2.22361582 | -4.5622742      | 1.19982322 | 3.80245535 | 0.00014327 | 0.0090299  | arrd-26   |
| C28F5.2                | 6.42940958 | -4.5117297      | 0.91303158 | 4.9414826  | 7.75E-07   | 0.00015218 | glb-9     |
| F32D8.10               | 3.22874695 | -4.4702951      | 1.27444141 | 3.50765054 | 0.00045208 | 0.02098518 | F32D8.10  |
| F43C9.2                | 7.43422057 | -4.3882871      | 0.96811756 | 4.53280398 | 5.82E-06   | 0.00086138 | F43C9.2   |
| F10E9.12               | 1.93300536 | -4.2995829      | 1.21712871 | 3.53256225 | 0.00041155 | 0.01991107 | F10E9.12  |
| ZK525.1                | 164.980828 | -4.1980681      | 0.35919527 | 11.6874258 | 1.48E-31   | 9.70E-28   | flp-15    |
| F31D4.8                | 16.8852954 | -4.1429608      | 0.59033242 | 7.01801325 | 2.25E-12   | 1.41E-09   | F31D4.8   |
| C52B9.1                | 6.27596045 | -4.0014462      | 0.90009151 | 4.44559932 | 8.76E-06   | 0.00109479 | cka-2     |
| T25F10.3               | 2.40640302 | -3.9657041      | 1.15792863 | 3.42482601 | 0.00061519 | 0.02658099 | T25F10.3  |
| C50D2.2                | 2.32471667 | -3.9389373      | 1.11238665 | 3.54097859 | 0.00039865 | 0.01956213 | C50D2.2   |
| T01B10.4               | 2.042184   | -3.8347596      | 1.2839331  | 2.986729   | 0.0028198  | 0.08043099 | nhr-14    |
| F1 6B4.8               | 17.0052536 | -3.8234431      | 0.5927746  | 6.45007923 | 1.12E-10   | 4.80E-08   | cdc-25.2  |
| F35H10.10              | 6.8267351  | -3.7446025      | 0.80083767 | 4.67585707 | 2.93E-06   | 0.00051565 | F35H10.10 |
| T28F2.3                | 2.91380979 | -3.7231182      | 1.12948641 | 3.29629306 | 0.0009797  | 0.03752634 | cah-6     |
| T01D3.7                | 4.93110436 | -3.7012233      | 1.05294867 | 3.51510329 | 0.00043958 | 0.02082714 | T01D3.7   |
| F55C12.4               | 2.50880167 | -3.575991       | 1.06725963 | 3.35062896 | 0.00080628 | 0.03357067 | F55C12.4  |
| T23G11.6               | 2.263758   | -3.4926988      | 1.1143712  | 3.134233   | 0.00172304 | 0.05679789 | Iron-9    |
| C49F8.3                | 1.834561   | -3.4892562      | 1.1801507  | 2.956619   | 0.00311032 | 0.08651603 | C49F8.3   |
| Y73B6BL.9              | 117.65416  | -3.4737824      | 0.33177041 | 10.4704407 | 1.18E-25   | 2.70E-22   | hil-2     |
| ZK337.2                | 7.51285056 | -3.4037595      | 0.70854446 | 4.8038757  | 1.56E-06   | 0.00029698 | klu-1     |
| F53C3.12               | 2.30234    | -3.342929       | 1.1558272  | 2.892239   | 0.00382506 | 0.09850844 | bcmo-2    |
| Y51A2D.15              | 3.71786927 | -3.3219911      | 0.9301508  | 3.57145436 | 0.000355   | 0.01793294 | grdn-1    |
| C30F12.1               | 5.05284828 | -3.2807431      | 0.84786963 | 3.86939567 | 0.00010911 | 0.00742133 | rege-1    |
| W10G6.3                | 2.810952   | -3.251047       | 1.0950925  | 2.968742   | 0.00299022 | 0.0838481  | mua-6     |
| Y75B7AL.1              | 5.35856483 | -3.235369       | 0.84643231 | 3.82235995 | 0.00013218 | 0.00851524 | glb-33    |
| T05A8.3                | 17.2049178 | -3.2330046      | 0.87627562 | 3.68948369 | 0.00022471 | 0.01239775 | T05A8.3   |
| C53C11.3               | 3.53661071 | -3.2096394      | 1.00188612 | 3.20359703 | 0.00135722 | 0.04734043 | ptr-5     |
| R05H11.2               | 80.3363322 | -3.0819062      | 0.26494354 | 11.6323132 | 2.82E-31   | 9.70E-28   | R05H11.2  |
| C06H2.5                | 17.8960466 | -3.0044336      | 0.47371263 | 6.3423126  | 2.26E-10   | 9.15E-08   | glb-3     |
| C18A3.4                | 13.3305886 | -2.9701768      | 0.69521831 | 4.27229366 | 1.93E-05   | 0.00192631 | osta-2    |
| T09B4.5                | 38.6945977 | -2.9232904      | 0.48964205 | 5.97026013 | 2.37E-09   | 7.08E-07   | T09B4.5   |
| C05G5.7                | 20.2421465 | -2.9025752      | 0.49112557 | 5.91004707 | 3.42E-09   | 9.79E-07   | C05G5.7   |
| T06D8.1                | 4.79930911 | -2.8861635      | 0.87175844 | 3.31073762 | 0.0009305  | 0.03632138 | srap-1    |
| T04F8.9                | 5.51212189 | -2.8644575      | 0.77792652 | 3.68216968 | 0.00023126 | 0.01260903 | T04F8.9   |
| F15G9.5                | 7.27428588 | -2.8467468      | 0.656899   | 4.33361414 | 1.47E-05   | 0.00162532 | F15G9.5   |
| C30G7.2                | 5.1870672  | -2.8438054      | 0.84950278 | 3.34761163 | 0.00081511 | 0.03360502 | C30G7.2   |

|            |            |            |            |            |            |            |           |
|------------|------------|------------|------------|------------|------------|------------|-----------|
| T02C12.1   | 8.18477688 | -2.8330999 | 0.6620457  | 4.27931165 | 1.87E-05   | 0.00191987 | hum-5     |
| T21D12.9   | 5.53413271 | -2.8011669 | 0.73761056 | 3.79762318 | 0.00014609 | 0.009124   | sma-10    |
| T05A8.8    | 5.12113294 | -2.7894225 | 0.70865253 | 3.93623442 | 8.28E-05   | 0.00615408 | T05A8.8   |
| F32H2.5    | 7.452785   | -2.7742985 | 0.66735277 | 4.15716935 | 3.22E-05   | 0.00291266 | fasn-1    |
| Y39A3CL.2  | 4.587384   | -2.7483961 | 0.8946785  | 3.071937   | 0.00212675 | 0.06581414 | rimb-1    |
| K07D4.8    | 13.3730206 | -2.7245678 | 0.50875507 | 5.35536248 | 8.54E-08   | 1.89E-05   | pqn-48    |
| T19D12.6   | 4.1306     | -2.6874172 | 0.9202694  | 2.92025    | 0.0034975  | 0.09399201 | T19D12.6  |
| Y22D7AL.8  | 3.460784   | -2.6471055 | 0.8969722  | 2.951157   | 0.00316586 | 0.08740584 | sms-3     |
| F19B10.10  | 21.3706571 | -2.6428693 | 0.39057022 | 6.76669442 | 1.32E-11   | 7.33E-09   | F19B10.10 |
| ZK909.4    | 3.411797   | -2.6322978 | 0.8645328  | 3.044763   | 0.00232864 | 0.06955533 | ces-2     |
| C54G4.5    | 3.21844    | -2.6223438 | 0.8694378  | 3.016137   | 0.00256017 | 0.07484424 | C54G4.5   |
| F49E10.5   | 3.568208   | -2.5731958 | 0.8399179  | 3.063628   | 0.00218671 | 0.06706558 | ctbp-1    |
| C32D5.7    | 4.45550972 | -2.5535993 | 0.77568711 | 3.29204809 | 0.00099461 | 0.03752634 | C32D5.7   |
| C44F1.3    | 28.0009977 | -2.5259129 | 0.37484168 | 6.73861276 | 1.60E-11   | 7.85E-09   | lec-4     |
| Y71G12B.16 | 15.1376572 | -2.4702998 | 0.4310207  | 5.73127868 | 9.97E-09   | 2.74E-06   | drag-1    |
| C04E12.7   | 5.04487601 | -2.3480571 | 0.65509138 | 3.58431986 | 0.00033796 | 0.0173466  | scrm-3    |
| F45E1.2    | 4.8447304  | -2.3220069 | 0.70946161 | 3.27291415 | 0.00106445 | 0.03889765 | F45E1.2   |
| D2092.6    | 7.65930396 | -2.305441  | 0.59816141 | 3.85421225 | 0.0001161  | 0.00781987 | D2092.6   |
| F11C1.6    | 6.53651    | -2.30243   | 0.7376172  | 3.121443   | 0.00179967 | 0.05859595 | nhr-25    |
| F26D11.10  | 4.86209636 | -2.2704042 | 0.6879095  | 3.30044018 | 0.00096533 | 0.03725751 | che-7     |
| W08A12.3   | 5.67833507 | -2.2613436 | 0.67596583 | 3.34535192 | 0.00082178 | 0.03360502 | W08A12.3  |
| F25H5.1    | 15.1137709 | -2.241816  | 0.63130826 | 3.55106396 | 0.00038368 | 0.01910045 | lim-9     |
| C39E6.4    | 155.991372 | -2.2351062 | 0.23933665 | 9.33875434 | 9.75E-21   | 1.12E-17   | mls-2     |
| M05B5.2    | 9.00123501 | -2.2144684 | 0.51320254 | 4.31499888 | 1.60E-05   | 0.00168689 | let-522   |
| C44C11.1   | 91.1495286 | -2.2046676 | 0.25439459 | 8.66633043 | 4.46E-18   | 3.83E-15   | ras-1     |
| R08C7.12   | 11.191213  | -2.1999446 | 0.58976361 | 3.73021428 | 0.00019132 | 0.01103987 | R08C7.12  |
| T01E8.3    | 5.83017424 | -2.1953069 | 0.58954473 | 3.7237326  | 0.0001963  | 0.01106309 | plc-3     |
| F55C5.3    | 4.250925   | -2.1756469 | 0.747322   | 2.911257   | 0.00359977 | 0.0958544  | twk-24    |
| T19E7.6    | 4.445232   | -2.1736753 | 0.7269539  | 2.990115   | 0.00278873 | 0.08016136 | T19E7.6   |
| F08G2.7    | 7.01123017 | -2.1661415 | 0.64857146 | 3.33986557 | 0.00083819 | 0.03397145 | F08G2.7   |
| R02E12.5   | 7.91289554 | -2.1227029 | 0.59226882 | 3.58401936 | 0.00033835 | 0.0173466  | R02E12.5  |
| ZC132.4    | 20.3037772 | -2.1006394 | 0.50494747 | 4.1601148  | 3.18E-05   | 0.00291266 | ZC132.4   |
| F49E12.6   | 35.8504122 | -2.0825939 | 0.30810718 | 6.75931642 | 1.39E-11   | 7.33E-09   | efl-3     |
| H27C11.1   | 10.7576571 | -2.0705735 | 0.59889043 | 3.45734942 | 0.00054552 | 0.02417872 | nhr-97    |
| Y65B4BL.1  | 9.47895146 | -2.0493211 | 0.5005253  | 4.0943407  | 4.23E-05   | 0.0036357  | Y65B4BL.1 |
| F46C8.7    | 19.0400595 | -2.0453159 | 0.50710685 | 4.03330361 | 5.50E-05   | 0.00449806 | glb-16    |
| Y38C1BA.2  | 4.930628   | -2.0404611 | 0.642023   | 3.178174   | 0.00148206 | 0.05055851 | snn-1     |
| C50C3.9    | 6.33457482 | -2.0280392 | 0.57794079 | 3.5090778  | 0.00044966 | 0.02098518 | unc-36    |
| C34G6.4    | 6.206016   | -2.0231026 | 0.6562789  | 3.082687   | 0.00205141 | 0.06405978 | pqp-2     |
| F19B2.5    | 7.291303   | -2.0210459 | 0.6850437  | 2.950244   | 0.00317523 | 0.08740584 | F19B2.5   |
| F28B4.2    | 10.7297493 | -2.0010023 | 0.46792914 | 4.27629342 | 1.90E-05   | 0.00191987 | rgl-1     |
| C46H11.11  | 11.9852724 | -1.9894327 | 0.48553403 | 4.09741149 | 4.18E-05   | 0.00363324 | fhod-1    |
| K12F2.2    | 12.4998293 | -1.9860232 | 0.41680012 | 4.76492957 | 1.89E-06   | 0.00035078 | vab-8     |
| T22C8.8    | 7.29818737 | -1.9699576 | 0.56617199 | 3.47943315 | 0.00050248 | 0.02316784 | vab-9     |
| F55A4.2    | 12.9881329 | -1.960767  | 0.48435805 | 4.04817671 | 5.16E-05   | 0.00427249 | nlf-1     |
| T13H5.6    | 5.009567   | -1.9595866 | 0.6775986  | 2.891958   | 0.00382849 | 0.09850844 | T13H5.6   |
| F44G4.8    | 8.501526   | -1.9427094 | 0.6242212  | 3.112213   | 0.0018569  | 0.06017422 | dep-1     |
| F21D5.9    | 14.2581415 | -1.9409133 | 0.47039129 | 4.12616762 | 3.69E-05   | 0.00324879 | F21D5.9   |
| F58H10.1   | 11.738375  | -1.9400965 | 0.6422476  | 3.020792   | 0.00252114 | 0.07401821 | F58H10.1  |
| F22F1.1    | 277.399807 | -1.9211317 | 0.31168151 | 6.16376551 | 7.10E-10   | 2.44E-07   | hil-3     |

|           |            |            |            |            |            |            |           |
|-----------|------------|------------|------------|------------|------------|------------|-----------|
| F44E2.10  | 6.21366462 | -1.8427425 | 0.560391   | 3.28831557 | 0.00100789 | 0.03752634 | F44E2.10  |
| K08E5.2   | 10.0644874 | -1.8359864 | 0.50786962 | 3.61507429 | 0.00030026 | 0.01574654 | nac-3     |
| F08C6.7   | 19.2132654 | -1.8302918 | 0.33971451 | 5.38773523 | 7.14E-08   | 1.69E-05   | unc-98    |
| T10B10.4  | 78.8627584 | -1.8061174 | 0.22284895 | 8.10467085 | 5.29E-16   | 4.04E-13   | T10B10.4  |
| C13C4.4   | 6.77314    | -1.7916252 | 0.5638847  | 3.17729    | 0.00148658 | 0.05055851 | C13C4.4   |
| F07C6.4   | 75.8379683 | -1.7900074 | 0.28719129 | 6.23280547 | 4.58E-10   | 1.66E-07   | F07C6.4   |
| F42G4.3   | 27.3709441 | -1.7898437 | 0.45143419 | 3.96479438 | 7.35E-05   | 0.00567039 | zyx-1     |
| F37A8.5   | 76.2385642 | -1.7883321 | 0.42707635 | 4.18738266 | 2.82E-05   | 0.00261979 | F37A8.5   |
| W02D9.10  | 231.826969 | -1.7807756 | 0.17414601 | 10.2257617 | 1.52E-24   | 2.61E-21   | W02D9.10  |
| W02B8.1   | 11.1459889 | -1.7393745 | 0.45727691 | 3.8037663  | 0.00014251 | 0.0090299  | W02B8.1   |
| F33C8.3   | 13.392557  | -1.7311253 | 0.44211294 | 3.91557249 | 9.02E-05   | 0.00638768 | tsp-8     |
| R12H7.1   | 11.3029177 | -1.7286201 | 0.4599535  | 3.75824979 | 0.00017111 | 0.01022173 | unc-9     |
| F46H6.1   | 12.1698361 | -1.7256188 | 0.40488584 | 4.26198844 | 2.03E-05   | 0.00196052 | rhi-1     |
| F01G12.5  | 21.3031616 | -1.7233596 | 0.50033445 | 3.44441525 | 0.0005723  | 0.02520304 | let-2     |
| K05G3.3   | 8.77310247 | -1.7034448 | 0.51339676 | 3.31798908 | 0.00090668 | 0.03579824 | cah-3     |
| F45E1.7   | 12.5462391 | -1.7012888 | 0.45570649 | 3.73329956 | 0.00018899 | 0.01100292 | sdpn-1    |
| Y54E5B.1  | 22.918993  | -1.7000122 | 0.37867361 | 4.48938655 | 7.14E-06   | 0.00096218 | smp-1     |
| C48A7.1   | 20.4225952 | -1.6974015 | 0.4800832  | 3.53564022 | 0.00040679 | 0.01982011 | egl-19    |
| F26F4.5   | 69.362556  | -1.6942338 | 0.5324367  | 3.182038   | 0.00146243 | 0.05023438 | F26F4.5   |
| C33B4.3   | 20.1540679 | -1.6777202 | 0.44775727 | 3.74694131 | 0.000179   | 0.01060135 | shn-1     |
| T12A7.2   | 14.9463862 | -1.6744993 | 0.4188446  | 3.99790112 | 6.39E-05   | 0.00504642 | T12A7.2   |
| T22C1.7   | 16.0317699 | -1.6701133 | 0.51854941 | 3.22074088 | 0.0012786  | 0.04527815 | jph-1     |
| Y43F8B.2  | 131.674773 | -1.6661172 | 0.29707585 | 5.60838977 | 2.04E-08   | 5.40E-06   | Y43F8B.2  |
| T06C10.4  | 14.9329536 | -1.6581618 | 0.39525078 | 4.19521434 | 2.73E-05   | 0.00256556 | flp-10    |
| F25H8.3   | 68.0917646 | -1.6452291 | 0.36980542 | 4.44890461 | 8.63E-06   | 0.00109479 | gon-1     |
| F42G8.11  | 7.494057   | -1.570831  | 0.5154163  | 3.047694   | 0.00230605 | 0.06950667 | sph-1     |
| Y15E3A.5  | 34.3150071 | -1.5555013 | 0.34113445 | 4.55978952 | 5.12E-06   | 0.00078173 | Y15E3A.5  |
| T11F9.11  | 14.0183837 | -1.5408766 | 0.4653     | 3.31157652 | 0.00092772 | 0.03632138 | dhs-19    |
| F53G12.5  | 64.3063346 | -1.5375681 | 0.35278471 | 4.35837509 | 1.31E-05   | 0.00155205 | mex-3     |
| C26E6.2   | 32.989894  | -1.5174407 | 0.32067506 | 4.73201965 | 2.22E-06   | 0.00040189 | flh-2     |
| C01F6.6   | 14.903184  | -1.5082342 | 0.39397825 | 3.82821694 | 0.00012907 | 0.00844519 | nrfl-1    |
| C18H9.7   | 28.8862293 | -1.5069442 | 0.26982069 | 5.58498414 | 2.34E-08   | 5.95E-06   | rpy-1     |
| Y71H10B.1 | 82.2056788 | -1.493053  | 0.33418276 | 4.46777383 | 7.90E-06   | 0.00104421 | Y71H10B.1 |
| T23G4.1   | 29.8797578 | -1.4787024 | 0.36961652 | 4.00063937 | 6.32E-05   | 0.00504638 | tlp-1     |
| C01C10.3  | 40.80348   | -1.4708649 | 0.33590336 | 4.37883361 | 1.19E-05   | 0.00143807 | acl-12    |
| B0034.3   | 22.668541  | -1.4276013 | 0.4612311  | 3.095198   | 0.00196682 | 0.06253367 | casy-1    |
| F54G8.3   | 21.5379352 | -1.4261671 | 0.36790784 | 3.87642493 | 0.000106   | 0.00735593 | ina-1     |
| F14B4.2   | 47.1906766 | -1.4198141 | 0.30492629 | 4.65625356 | 3.22E-06   | 0.00053957 | hxx-1     |
| B0464.4   | 22.3489578 | -1.4176703 | 0.31762951 | 4.46328285 | 8.07E-06   | 0.00104623 | bre-3     |
| C02B10.5  | 76.6244438 | -1.4051987 | 0.28046548 | 5.0102375  | 5.44E-07   | 0.00010985 | C02B10.5  |
| F52D2.6   | 51.6522398 | -1.4013905 | 0.27038398 | 5.18296421 | 2.18E-07   | 4.55E-05   | F52D2.6   |
| Y22F5A.3  | 29.0937367 | -1.3968047 | 0.30195512 | 4.62586854 | 3.73E-06   | 0.00059598 | ric-4     |
| T19H5.4   | 24.186515  | -1.3666714 | 0.4702452  | 2.906296   | 0.00365736 | 0.09663866 | T19H5.4   |
| T07A9.7   | 69.768756  | -1.3417783 | 0.19979611 | 6.71573806 | 1.87E-11   | 8.57E-09   | gpa-4     |
| ZK617.1   | 11.843322  | -1.3393497 | 0.4396667  | 3.046284   | 0.00231689 | 0.06950667 | unc-22    |
| C12C8.1   | 21.208646  | -1.3382157 | 0.4553537  | 2.938849   | 0.00329434 | 0.09016769 | hsp-70    |
| T13B5.1   | 173.407423 | -1.3133264 | 0.20830019 | 6.30496985 | 2.88E-10   | 1.10E-07   | snf-3     |
| Y47D3A.17 | 19.7880015 | -1.3096509 | 0.37304252 | 3.51072823 | 0.00044688 | 0.02098518 | obr-1     |
| W03G9.1   | 36.648037  | -1.2985345 | 0.34454586 | 3.76882919 | 0.00016402 | 0.01004749 | snf-1     |
| R02E12.2  | 51.607165  | -1.2969935 | 0.4192553  | 3.093565   | 0.00197767 | 0.06253367 | mop-25.1  |

|            |            |            |            |            |            |            |           |
|------------|------------|------------|------------|------------|------------|------------|-----------|
| H24G06.1   | 55.8792185 | -1.2849119 | 0.37585582 | 3.4186299  | 0.00062937 | 0.02702369 | H24G06.1  |
| C33A11.1   | 57.3803494 | -1.2795917 | 0.29830158 | 4.28959085 | 1.79E-05   | 0.00186325 | nfki-1    |
| T05H10.4   | 26.231066  | -1.2763515 | 0.32124182 | 3.97317983 | 7.09E-05   | 0.00553655 | T05H10.4  |
| Y41C4A.13  | 57.5326835 | -1.2749685 | 0.21247159 | 6.00065415 | 1.97E-09   | 6.14E-07   | sup-1     |
| C17C3.1    | 23.7159656 | -1.2745038 | 0.3490298  | 3.6515615  | 0.00026065 | 0.01409976 | C17C3.1   |
| T06E6.2    | 289.64723  | -1.2610586 | 0.4138514  | 3.047129   | 0.00231038 | 0.06950667 | cyb-3     |
| ZK637.1    | 42.2349534 | -1.2308499 | 0.35530066 | 3.46424897 | 0.00053171 | 0.02371997 | svop-1    |
| R03E9.3    | 38.925582  | -1.2307769 | 0.27917095 | 4.40868529 | 1.04E-05   | 0.00127586 | abts-4    |
| C45G3.1    | 25.8782562 | -1.2208324 | 0.28278052 | 4.31724349 | 1.58E-05   | 0.00168689 | aspm-1    |
| ZK524.2    | 50.937348  | -1.204126  | 0.36210148 | 3.32538269 | 0.00088297 | 0.03520891 | unc-13    |
| W09D6.5    | 86.3311025 | -1.1838784 | 0.19695918 | 6.01078054 | 1.85E-09   | 6.04E-07   | W09D6.5   |
| F57F5.5    | 56.7328472 | -1.181782  | 0.30123409 | 3.92313493 | 8.74E-05   | 0.00637325 | pkc-1     |
| B0365.3    | 121.591287 | -1.1720173 | 0.35497551 | 3.30168489 | 0.00096106 | 0.03725751 | eat-6     |
| T14F9.4    | 49.0579525 | -1.1714267 | 0.2999811  | 3.90500178 | 9.42E-05   | 0.00660534 | peb-1     |
| K08H10.2   | 289.368135 | -1.1708231 | 0.26950927 | 4.34427785 | 1.40E-05   | 0.00157373 | K08H10.2  |
| C06G3.2    | 30.9144771 | -1.1642116 | 0.3072336  | 3.78933664 | 0.00015105 | 0.00934878 | klp-18    |
| Y47D3A.6   | 19.1540876 | -1.155003  | 0.34523977 | 3.34550953 | 0.00082132 | 0.03360502 | tra-1     |
| C53C11.5   | 14.167833  | -1.1482234 | 0.395382   | 2.904086   | 0.00368327 | 0.0969397  | C53C11.5  |
| Y56A3A.29  | 38.7753507 | -1.1387706 | 0.3287043  | 3.46442265 | 0.00053137 | 0.02371997 | ung-1     |
| F47F6.1    | 234.291006 | -1.1276089 | 0.35214588 | 3.20210747 | 0.00136426 | 0.04734043 | lin-42    |
| Y47D9A.2   | 34.982855  | -1.09523   | 0.3743581  | 2.925621   | 0.00343769 | 0.09334756 | scpl-3    |
| T27F2.2    | 21.502562  | -1.0913504 | 0.3736086  | 2.921106   | 0.00348791 | 0.09399201 | sipa-1    |
| C07A9.12   | 13.112497  | -1.0893231 | 0.3592731  | 3.03202    | 0.00242923 | 0.07224606 | C07A9.12  |
| T20D4.6    | 36.1342034 | -1.0745024 | 0.25581677 | 4.20028136 | 2.67E-05   | 0.00254365 | arrd-22   |
| W06F12.1   | 101.632259 | -1.0576398 | 0.23369696 | 4.52568926 | 6.02E-06   | 0.0008616  | lit-1     |
| AC7.2      | 25.5425187 | -1.0370702 | 0.2924635  | 3.5459818  | 0.00039115 | 0.01933254 | soc-2     |
| F55F1.1    | 76.5125781 | -1.0370287 | 0.19733068 | 5.25528356 | 1.48E-07   | 3.17E-05   | F55F1.1   |
| Y105C5B.21 | 36.63704   | -1.0324217 | 0.3565687  | 2.895435   | 0.00378633 | 0.09815882 | jac-1     |
| Y53G8AM.8  | 22.655643  | -1.0292847 | 0.3288706  | 3.129756   | 0.00174951 | 0.05723411 | Y53G8AM.8 |
| F08B6.4    | 32.644672  | -1.0254591 | 0.30736653 | 3.33627433 | 0.00084909 | 0.0341127  | unc-87    |
| C14B4.2    | 122.379923 | -1.0214436 | 0.25068799 | 4.07456136 | 4.61E-05   | 0.00391006 | C14B4.2   |
| F42G9.9    | 19.352785  | -1.019695  | 0.3294334  | 3.0953     | 0.00196614 | 0.06253367 | ptl-1     |
| F08F1.8    | 22.177381  | -1.0171508 | 0.3298314  | 3.083851   | 0.0020434  | 0.06405978 | tth-1     |
| ZK381.5    | 54.3891759 | -1.0079839 | 0.21728418 | 4.63901181 | 3.50E-06   | 0.00057263 | prkl-1    |
| B0336.1    | 45.914659  | -0.9816407 | 0.3362004  | 2.919808   | 0.00350247 | 0.09399201 | wrm-1     |
| C43E11.6   | 45.4056406 | -0.9423236 | 0.28600161 | 3.29481911 | 0.00098485 | 0.03752634 | nab-1     |
| W04D2.1    | 56.4428428 | -0.9397792 | 0.21608755 | 4.34906696 | 1.37E-05   | 0.00156542 | atn-1     |
| C10E2.6    | 78.0954021 | -0.93889   | 0.26687946 | 3.51803017 | 0.00043476 | 0.02074182 | mct-6     |
| C35D10.13  | 223.161433 | -0.9193072 | 0.26484215 | 3.47115147 | 0.00051823 | 0.02357782 | C35D10.13 |
| K04H4.1    | 172.087543 | -0.914601  | 0.25215287 | 3.62716873 | 0.00028655 | 0.01514286 | emb-9     |
| F52G3.1    | 79.9325294 | -0.9035247 | 0.26561538 | 3.40162795 | 0.00066986 | 0.02840693 | F52G3.1   |
| ZK177.6    | 97.5760965 | -0.9023406 | 0.20013999 | 4.50854716 | 6.53E-06   | 0.00089685 | fzy-1     |
| Y49E10.6   | 879.392385 | -0.9012024 | 0.24202955 | 3.72352235 | 0.00019646 | 0.01106309 | his-72    |
| ZK1151.1   | 213.511523 | -0.8990057 | 0.3101886  | 2.898256   | 0.00375245 | 0.09764889 | vab-10    |
| Y113G7B.23 | 422.381722 | -0.8882372 | 0.2805206  | 3.166389   | 0.00154344 | 0.05197767 | swsn-1    |
| F43G9.9    | 21.338275  | -0.883303  | 0.2957611  | 2.986542   | 0.00282152 | 0.08043099 | cpn-1     |
| F54B11.3   | 72.3270871 | -0.8675679 | 0.22002523 | 3.94303817 | 8.05E-05   | 0.00614146 | unc-84    |
| Y59H11AR.2 | 104.367155 | -0.8546834 | 0.24826824 | 3.44258036 | 0.00057619 | 0.02521302 | catp-7    |
| Y69A2AR.7  | 39.515101  | -0.849774  | 0.25884596 | 3.2829332  | 0.00102733 | 0.03774202 | epg-9     |
| F26B1.3    | 328.541295 | -0.8389909 | 0.2449029  | 3.42581052 | 0.00061297 | 0.02658099 | ima-2     |

|             |            |            |            |            |            |            |            |
|-------------|------------|------------|------------|------------|------------|------------|------------|
| F36D4.3     | 121.253849 | -0.8377846 | 0.23025789 | 3.63846226 | 0.00027427 | 0.01472063 | hum-2      |
| F55G1.4     | 44.1313926 | -0.8357662 | 0.24486556 | 3.41316344 | 0.00064213 | 0.02740038 | rod-1      |
| F23B12.8    | 27.600287  | -0.8280302 | 0.2677484  | 3.092568   | 0.00198433 | 0.06253367 | bmK-1      |
| T05G5.3     | 276.949613 | -0.8123365 | 0.18823952 | 4.31544096 | 1.59E-05   | 0.00168689 | cdk-1      |
| ZK484.4     | 56.7676944 | -0.8005727 | 0.24351448 | 3.28757724 | 0.00101053 | 0.03752634 | ZK484.4    |
| C04C11.2    | 55.1867623 | -0.7839628 | 0.20514353 | 3.82153317 | 0.00013262 | 0.00851524 | arrd-25    |
| F32A7.5     | 104.836748 | -0.7447384 | 0.20094506 | 3.70617935 | 0.00021041 | 0.01175213 | maph-1.1   |
| Y69A2AR.30  | 328.04706  | -0.742828  | 0.19888859 | 3.73489477 | 0.00018779 | 0.01100292 | mdf-2      |
| C26C6.5     | 79.8945488 | -0.7325429 | 0.20456325 | 3.58100904 | 0.00034227 | 0.01741773 | dcp-66     |
| F28C1.3     | 45.2670596 | -0.7281156 | 0.22618113 | 3.21917032 | 0.00128562 | 0.04529342 | F28C1.3    |
| T09B9.4     | 50.8616853 | -0.7170812 | 0.22199847 | 3.23011756 | 0.00123739 | 0.04427548 | T09B9.4    |
| ZC168.4     | 67.219783  | -0.7161476 | 0.2427856  | 2.949712   | 0.00318071 | 0.08740584 | cyb-1      |
| R04A9.2     | 49.5885729 | -0.7154935 | 0.20641934 | 3.4662134  | 0.00052784 | 0.02371997 | nrde-3     |
| C34F11.3    | 51.6688035 | -0.7136762 | 0.21156448 | 3.373327   | 0.00074266 | 0.03129116 | ampd-1     |
| D2023.2     | 110.557242 | -0.7043079 | 0.16978086 | 4.1483352  | 3.35E-05   | 0.00298802 | pyc-1      |
| F20D12.5    | 147.844297 | -0.6614121 | 0.208454   | 3.172941   | 0.00150903 | 0.05106922 | exc-9      |
| C27C12.2    | 53.358324  | -0.6432961 | 0.2050648  | 3.137039   | 0.00170663 | 0.05664048 | egrh-1     |
| B0379.4     | 113.443821 | -0.6412742 | 0.19499571 | 3.28865768 | 0.00100666 | 0.03752634 | scpl-1     |
| T22F3.3     | 95.1072598 | -0.6361966 | 0.17064347 | 3.72822116 | 0.00019284 | 0.01103987 | pygl-1     |
| F33G12.6    | 49.705523  | -0.6355775 | 0.2051498  | 3.098114   | 0.00194757 | 0.06252238 | F33G12.6   |
| Y67D8C.10   | 133.64517  | -0.5802355 | 0.16460114 | 3.52509984 | 0.00042332 | 0.02033728 | mca-3      |
| Y104H12BR.1 | 118.31027  | -0.5789008 | 0.1741458  | 3.32423046 | 0.00088663 | 0.03520891 | plst-1     |
| F32D1.10    | 567.140468 | -0.5477174 | 0.16680072 | 3.28366336 | 0.00102467 | 0.03774202 | mcm-7      |
| C09B8.6     | 111.136355 | -0.539317  | 0.15010844 | 3.59284941 | 0.00032708 | 0.01702311 | hsp-25     |
| F09C8.2     | 128.706889 | -0.5064155 | 0.15854173 | 3.19420918 | 0.00140214 | 0.0484057  | F09C8.2    |
| H06O01.1    | 353.54509  | 0.3345586  | 0.1152489  | -2.902923  | 0.00369697 | 0.0969397  | pdi-3      |
| E04A4.5     | 332.97673  | 0.3721427  | 0.1283115  | -2.900306  | 0.00372798 | 0.09738108 | timM-17B.1 |
| Y54E2A.11   | 261.127657 | 0.40159095 | 0.10672878 | -3.7627241 | 0.00016807 | 0.01012859 | eif-3.B    |
| C30C11.4    | 612.850295 | 0.4374191  | 0.1410602  | -3.100938  | 0.00192908 | 0.06221977 | hsp-110    |
| C15H9.6     | 522.148047 | 0.4648205  | 0.1520833  | -3.056354  | 0.00224047 | 0.06840894 | hsp-3      |
| F15C11.2    | 123.306095 | 0.52678942 | 0.16289909 | -3.233839  | 0.00122138 | 0.04397991 | ubql-1     |
| F53E10.6    | 64.851635  | 0.5352744  | 0.1784134  | -3.000193  | 0.00269809 | 0.07803344 | F53E10.6   |
| C08F8.1     | 57.347649  | 0.5571294  | 0.1915618  | -2.908354  | 0.00363337 | 0.09637554 | pdf-1      |
| Y57G11C.15  | 615.380944 | 0.55748832 | 0.174102   | -3.2020788 | 0.0013644  | 0.04734043 | sec-61     |
| F32D8.6     | 155.961671 | 0.59641036 | 0.17688563 | -3.3717288 | 0.00074698 | 0.03129116 | emo-1      |
| F22B5.10    | 45.47339   | 0.6026689  | 0.200371   | -3.007766  | 0.00263176 | 0.07661097 | F22B5.10   |
| F15D4.3     | 138.472852 | 0.6049805  | 0.1974035  | -3.06469   | 0.00217896 | 0.06706558 | romo-1     |
| Y82E9BR.3   | 1184.61847 | 0.6206881  | 0.16477274 | -3.7669343 | 0.00016526 | 0.01004749 | Y82E9BR.3  |
| T05E11.5    | 137.615195 | 0.62932279 | 0.13729553 | -4.5837093 | 4.57E-06   | 0.00071323 | imp-2      |
| F46H5.2     | 92.783169  | 0.6294835  | 0.2114079  | -2.977578  | 0.00290535 | 0.08180238 | F46H5.2    |
| M117.2      | 1072.4932  | 0.64478735 | 0.16833944 | -3.8302809 | 0.000128   | 0.00844519 | par-5      |
| Y38C1AA.4   | 86.1533312 | 0.66617637 | 0.18060889 | -3.6885026 | 0.00022558 | 0.01239775 | tcl-2      |
| F25H2.10    | 787.551724 | 0.6854658  | 0.2339459  | -2.930019  | 0.00338941 | 0.09240184 | rla-0      |
| F01F1.8     | 1122.23847 | 0.6880134  | 0.2236028  | -3.076945  | 0.00209134 | 0.06501137 | cct-6      |
| Y22D7AL.5   | 1003.66427 | 0.7059176  | 0.2368409  | -2.980556  | 0.00287726 | 0.08134467 | hsp-60     |
| T18H9.7     | 35.14044   | 0.7167174  | 0.2280709  | -3.14252   | 0.001675   | 0.05586057 | tag-232    |
| Y48B6A.14   | 891.905536 | 0.7178651  | 0.2291007  | -3.133404  | 0.00172791 | 0.05679789 | hmg-1.1    |
| T04G9.5     | 214.171898 | 0.72336038 | 0.13470518 | -5.3699522 | 7.88E-08   | 1.80E-05   | trap-2     |
| C36E8.3     | 40.9462701 | 0.72422026 | 0.22443818 | -3.226814  | 0.00125177 | 0.04455775 | pxd-1      |
| Y54E10A.16  | 107.088777 | 0.73173143 | 0.18997868 | -3.8516503 | 0.00011732 | 0.00782543 | mab-31     |

|           |            |            |            |            |            |            |         |
|-----------|------------|------------|------------|------------|------------|------------|---------|
| F37C12.13 | 72.1164343 | 0.73275845 | 0.21945071 | -3.3390571 | 0.00084063 | 0.03397145 | exos-9  |
| C29F9.7   | 75.0175792 | 0.75354503 | 0.19143894 | -3.9362161 | 8.28E-05   | 0.00615408 | pat-4   |
| ZC190.4   | 216.929465 | 0.78472061 | 0.18396304 | -4.2656429 | 1.99E-05   | 0.00195626 | ZC190.4 |
| F29C12.3  | 30.3107875 | 0.80194063 | 0.24644915 | -3.2539801 | 0.001138   | 0.04136548 | rict-1  |
| F47B7.1   | 1051.28895 | 0.80564111 | 0.1778382  | -4.5301916 | 5.89E-06   | 0.00086138 | F47B7.1 |
| R53.7     | 39.8465429 | 0.80979406 | 0.24612746 | -3.2901411 | 0.00100137 | 0.03752634 | aakg-5  |
| C01G6.1   | 1019.26807 | 0.81166624 | 0.2004927  | -4.048358  | 5.16E-05   | 0.00427249 | aqp-2   |
| T24H7.1   | 891.665078 | 0.8121701  | 0.2660965  | -3.052164  | 0.00227198 | 0.0690641  | phb-2   |
| T08B2.10  | 885.248143 | 0.8195439  | 0.2710568  | -3.023513  | 0.00249858 | 0.0739882  | rps-17  |
| F31E3.2   | 157.13697  | 0.83650502 | 0.23508971 | -3.5582375 | 0.00037335 | 0.01872208 | F31E3.2 |
| K08C7.3   | 213.035409 | 0.84964394 | 0.21593739 | -3.9346773 | 8.33E-05   | 0.00615408 | epi-1   |
| B0035.4   | 32.116959  | 0.8677055  | 0.2750063  | -3.155221  | 0.00160377 | 0.05374569 | pfd-4   |
| T03F7.1   | 48.2000073 | 0.87290811 | 0.22264291 | -3.9206642 | 8.83E-05   | 0.00637325 | snf-11  |
| C54E4.2   | 66.3144792 | 0.89144973 | 0.2454862  | -3.6313639 | 0.00028193 | 0.01501427 | test-1  |
| C50F4.13  | 345.092877 | 0.9065933  | 0.3066341  | -2.956597  | 0.00311055 | 0.08651603 | his-35  |
| T07H6.2   | 22.2073095 | 0.95987477 | 0.29685099 | -3.2335239 | 0.00122273 | 0.04397991 | mom-1   |
| T01C3.6   | 1621.34819 | 1.0369024  | 0.3554531  | -2.917129  | 0.0035327  | 0.09443442 | rps-16  |
| Y38A10A.5 | 339.158508 | 1.04043675 | 0.26551121 | -3.918617  | 8.91E-05   | 0.00637325 | crt-1   |
| R13F6.4   | 127.442829 | 1.06426169 | 0.23595708 | -4.5104038 | 6.47E-06   | 0.00089685 | ten-1   |
| D1054.8   | 32.4693758 | 1.14113837 | 0.26214888 | -4.3530164 | 1.34E-05   | 0.00156353 | D1054.8 |
| T01A4.3   | 27.505256  | 1.1620759  | 0.3874103  | -2.9996    | 0.00270334 | 0.07803344 | T01A4.3 |
| F22F4.2   | 52.1975498 | 1.16637195 | 0.21603663 | -5.3989546 | 6.70E-08   | 1.64E-05   | inx-3   |
| T01G9.3   | 22.6406325 | 1.18953561 | 0.34231777 | -3.4749456 | 0.00051096 | 0.02340183 | dma-1   |
| T28F4.1   | 144.292672 | 1.3032711  | 0.16678337 | -7.8141548 | 5.53E-15   | 3.80E-12   | T28F4.1 |
| C09D8.1   | 153.020119 | 1.66427405 | 0.1827058  | -9.1090378 | 8.31E-20   | 8.16E-17   | ptp-3   |
| F38B6.6   | 2.789607   | 2.8937525  | 0.9578417  | -3.021118  | 0.00251844 | 0.07401821 | F38B6.6 |
| F59B2.6   | 67.0238931 | 3.86820996 | 0.40968808 | -9.4418416 | 3.66E-21   | 5.03E-18   | zif-1   |
